# Supplementary material for: Starch Degradation and Sucrose Accumulation of Lily Bulbs after Cold Storage
Source: MDPI journal article supplement (doi:10.3390/ijms23084366), 2022-04-14
Supplement: s1 [file s1]

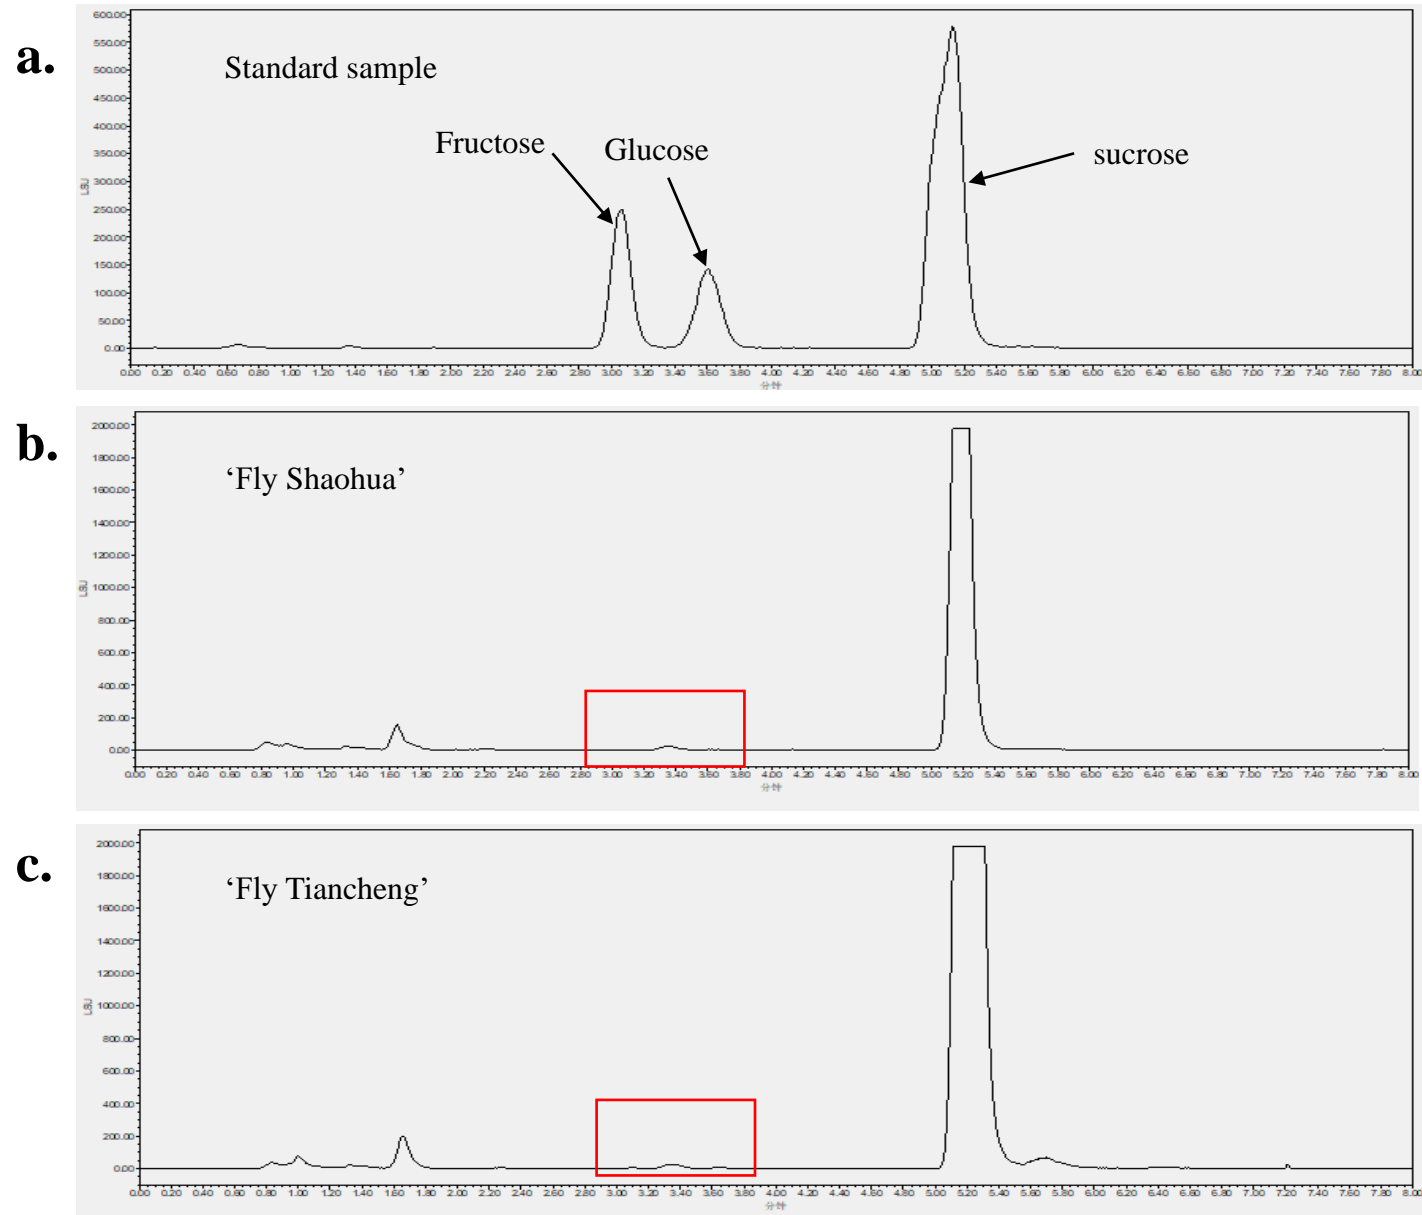

**Figure S1.** Chromatographic peaks of standard sample, 'Fly Shaohua' and 'Fly Tiancheng' bulbs extracting solution. **a**, **b** and **c** represent the standard sample, 'Fly Shaohua' bulbs extracting solution and 'Fly Tiancheng' bulbs extracting solution, respectively. The red box shows the extremely weak chromatographic peaks of fructose and glucose.
